# Supplementary material
Source: publisher figshare collection journal article supplement (https://sage.figshare.com/ndownloader/files/13836146)
Supplement: Supplementary file 1 [file 13836146]

| Table A2  *Theoretical Grounding of Reviewed Articles* | |
| --- | --- |
| Theoretical Framework or Model Used | Referencing Article |
| Bourdieu’s theoretical framework of social space and symbolic power (Bourdieu, 1989) | Gum et al., 2012 |
| Goffman’s theory of impression management (Goffman, 1956) | Lewin & Reeves, 2011 |
| The spatial becomes the social (Pred, 1985); Space–time geography (Giddens, 1985); Social relations in space (Gesler, 1999); Discourses and places (Gesler, 1999) | Liu et al., 2014 |
| Systems Engineering Initiative for Patient Safety (SEIPS) model of work system and patient safety (Carayon et al., 2006) | Mundt & Swedlund, 2016 |
| Karasek’s Demand-control-support model (Karasek & Theorell, 1990) | Parker et al., 2012; Zborowsky et al., 2010 |
| Distributed Cognition for Teamwork (DiCoT) (Furniss & Blandford, 2006) | Rajkomar et al., 2012 |
| Systems theories (Barbour et al., 2016; Donabedian, 1966) | Real et al., 2016 |

**References for Appendix Table 1. Theoretical Grounding of Reviewed Articles**

Bourdieu, P. (1989). Social space and symbolic power. *Sociological Theory*, *7*(1), 14-25 http://doi.org/10.2307/202060

Barbour, J. B., Gill, R., & Dean, M. (2016). Work space, gendered occupations, and the organization of health. In T. R. Harrison & E. A. Williams (Eds.), *Organizations, communication, and health* (pp.101–118). New York, NY: Routledge.

Carayon, P., Schoofs Hundt, A., Karsh, B.-T., Gurses, A. P., Alvarado, C. J., Smith, M., & Flatley Brennan, P. (2006). Work system design for patient safety: The SEIPS model. *Quality and Safety in Health Care*, *15*(suppl_1), i50–i58. http://doi.org/10.1136/qshc.2005.015842

Donabedian, A. (1966). Evaluating the quality of medical care. *Milbank Memorial Fund Quarterly, 44,* 166–206. doi:10.2307/3348969

Furniss, D., & Blandford, A. (2006). Understanding emergency medical dispatch in terms of distributed cognition: A case study. *Ergonomics*, *49*(12–13), 1174–1203. http://doi.org/10.1080/00140130600612663

Gesler, W. M. (1999). Words in wards: Language, health and place. *Health and Place*, *5*(1), 13–25. http://doi.org/10.1016/S1353-8292(98)00038-0

Giddens, A., 1985. Time, space and regionalization. In D. Gregory, J. Urry (Eds.), *Social relations and spatial structures.* Macmillan, Basingstoke, (pp. 265–295).

Pred, A. (2014). The social becomes the spatial, the spatial becomes the social: Enclosures, social change and the becoming of places in the Swedish province of Skane (1985). In J. J. Gieseking, W. Mangold, C. Katz, S. Low, & S. Saegert (Eds.), *The people, place, and space reader* (pp. 128–132). https://doi.org/10.4324/9781315816852

Karasek, R. A. & Theorell, T. (1990). *Healthy work: Stress, productivity and the reconstruction of working life.* New York: Basic Books.

Karasek, R. A. (1979). Job demands, job decision latitude, and mental strain: Implications for job redesign. *Administrative Science Quarterly*, *24*(2), 285. http://doi.org/10.2307/2392498
